# Supplementary material for: H2S-Mediated Protein S-Sulfhydration: A Prediction for Its Formation and Regulation
Source: MDPI journal article supplement (doi:10.3390/molecules22081334), 2017-08-11
Supplement: s1 [file s1]

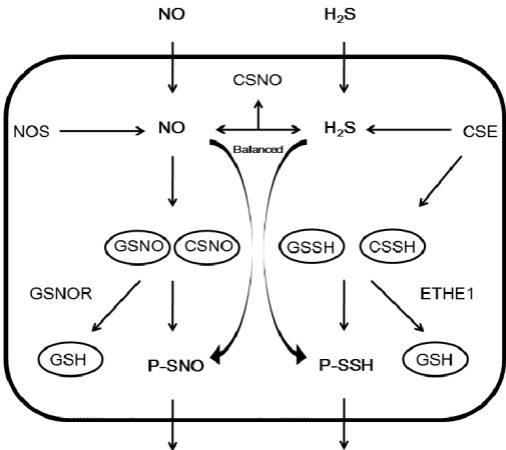

Different influences on signaling and metabolic pathways  
through alterations of protein activity
