# Supplementary material for: H2S-Mediated Protein S-Sulfhydration: A Prediction for Its Formation and Regulation
Source: Molecules. 2017 Aug 11;22(8):1334. doi: 10.3390/molecules22081334 (PMC6152389; doi:10.3390/molecules22081334)
Supplement: Supplementary File 1 [file molecules-22-01334-s001.zip]

Archive with 5 entries (5 files):
- molecules-22-01334-g005.pdf
- molecules-22-01334-g001.pdf
- molecules-22-01334-g002.pdf
- molecules-22-01334-g003.pdf
- molecules-22-01334-g004.pdf
