# Supplementary figures and images for: H2S-Mediated Protein S-Sulfhydration: A Prediction for Its Formation and Regulation
Source: MDPI journal article supplement (doi:10.3390/molecules22081334), 2017-08-11

A

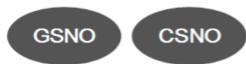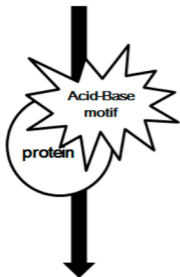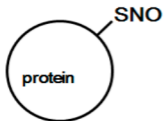

B

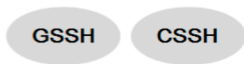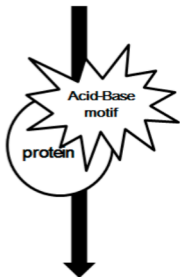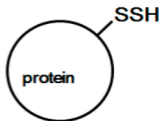

Supplement: s1 [file s1]

**A**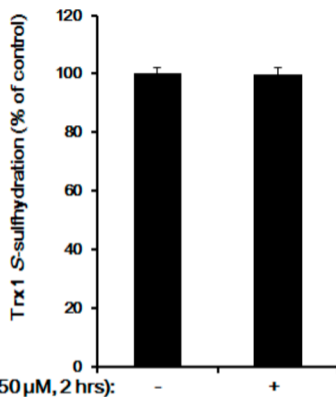

S-sulphydrated  
Trx1

Load  
Trx1

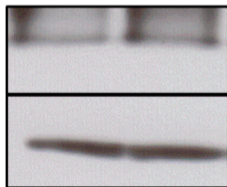**B**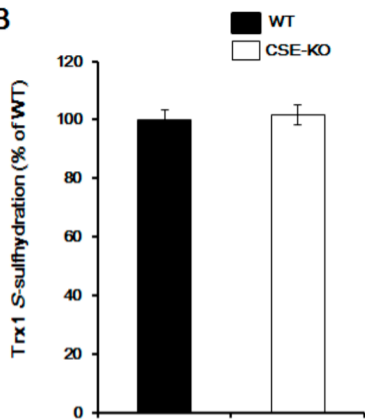

S-sulphydrated  
Trx1

Load  
Trx1

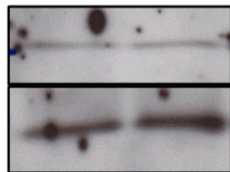

Supplement: s1 [file s1]

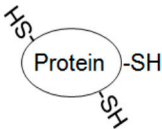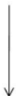

$\text{H}_2\text{O}_2$  or ROS

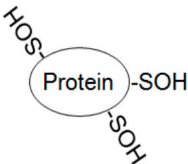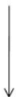

$\text{H}_2\text{S}$  or RSSH

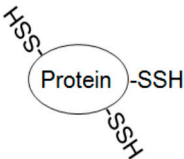

Supplement: s1 [file s1]

**A**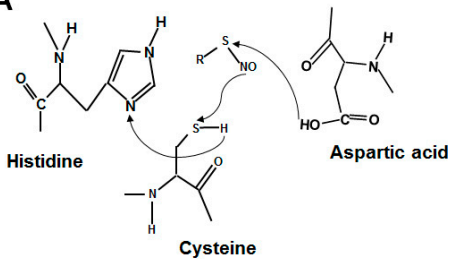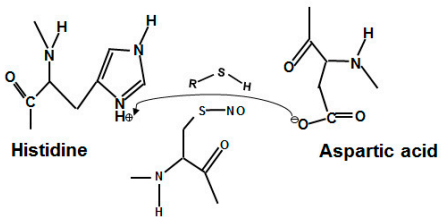**B**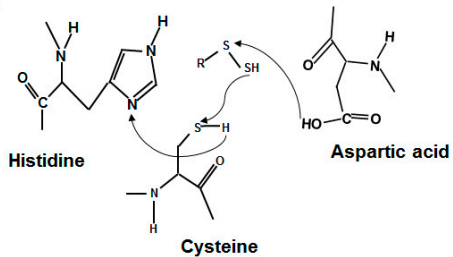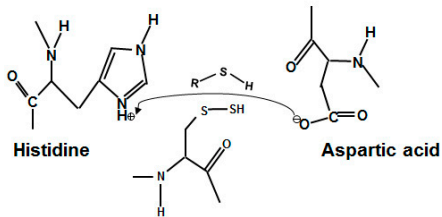

Supplement: s1 [file s1]
